# Supplementary material for: A flexible polyelectrolyte-based gel polymer electrolyte for high-performance all-solid-state supercapacitor application
Source: Royal Society of Chemistry journal article supplement (doi:10.1039/c9ra10701k), 2020-01-01
Supplement: c9ra10701k1.pdf [file c9ra10701k1.pdf]

## Supporting Information for

### A Flexible Polyelectrolyte-Based Gel Polymer Electrolyte for High-Performance All-Solid-State Supercapacitor Application

Chaojing Yan,<sup>a</sup> Mengyuan Jin,<sup>a</sup> Xinxin Pan,<sup>a</sup> Longli Ma,<sup>a</sup> and Xiaohua Ma<sup>\*a</sup>

<sup>a</sup>Department of Materials Science, Fudan University, Shanghai 200433, China

E-mail: [xhma@fudan.edu.cn](mailto:xhma@fudan.edu.cn)

**Table S1.** Room temperature ionic conductivity and mechanical properties of GPE film with different mass ratios (C<sub>3</sub>(Br)DMAEMA: PEGMA) and different electrolyte solution concentrations.

| The mass ratio of GPE components (C <sub>3</sub> (Br)DMAEMA : PEGMA) | Li <sub>2</sub> SO <sub>4</sub> /H <sub>2</sub> O solution concentration (mol L <sup>-1</sup> ) | Conductivity (mS cm <sup>-1</sup> ) | Mechanical properties |
|----------------------------------------------------------------------|-------------------------------------------------------------------------------------------------|-------------------------------------|-----------------------|
| 9:1                                                                  | 0.5                                                                                             | 45.2                                | Stretchable           |
|                                                                      | 1                                                                                               | 56.3                                | Stretchable           |
|                                                                      | 1.5                                                                                             | 56.6                                | Hard                  |
|                                                                      | 2                                                                                               | 55.4                                | Hard                  |
| 8:2                                                                  | 0.5                                                                                             | 58.9                                | Stretchable           |
|                                                                      | 1                                                                                               | 66.8                                | Stretchable           |
|                                                                      | 1.5                                                                                             | 66.2                                | Stretchable           |
|                                                                      | 2                                                                                               | 59.4                                | Hard                  |

|     |     |      |                  |
|-----|-----|------|------------------|
| 7:3 | 0.5 | 38.4 | A little brittle |
|     | 1   | 45.1 | A little brittle |
|     | 1.5 | 44.7 | Too brittle      |
|     | 2   | 40.1 | Too brittle      |

**Table S2.** The ionic conductivity of hydrogel polymer electrolytes already reported and PGPE reported in this work are compared.<sup>1-8</sup>

| Sample                                              | Conductivity<br>(mS cm <sup>-1</sup> ) | Temperature | Ref. |
|-----------------------------------------------------|----------------------------------------|-------------|------|
| P(NVP-co-DMDAAC)/PVA+KOH                            | 36.6                                   | 25 °C       | 1    |
| PVA-H <sub>3</sub> PO <sub>4</sub>                  | 4.1                                    | 30 °C       | 2    |
| PVA-H <sub>3</sub> PO <sub>4</sub>                  | 34                                     | 30 °C       | 3    |
| Chitosan+poly(diallyldimethylammonium chloride)+KOH | 24                                     | 30 °C       | 4    |
| B-PVA+GO+KCl                                        | 47.5                                   | RT          | 5    |
| Corn starch+citric acid                             | 2.30 ± 0.07                            | 23 °C       | 6    |
| Carboxylated chitosan+HCl                           | 86.9                                   | RT          | 7    |
| IL/DMSO+LiAc                                        | 39.8 ± 2.8                             | 25 °C       | 8    |
| This work                                           | 66.8                                   | 25 °C       |      |

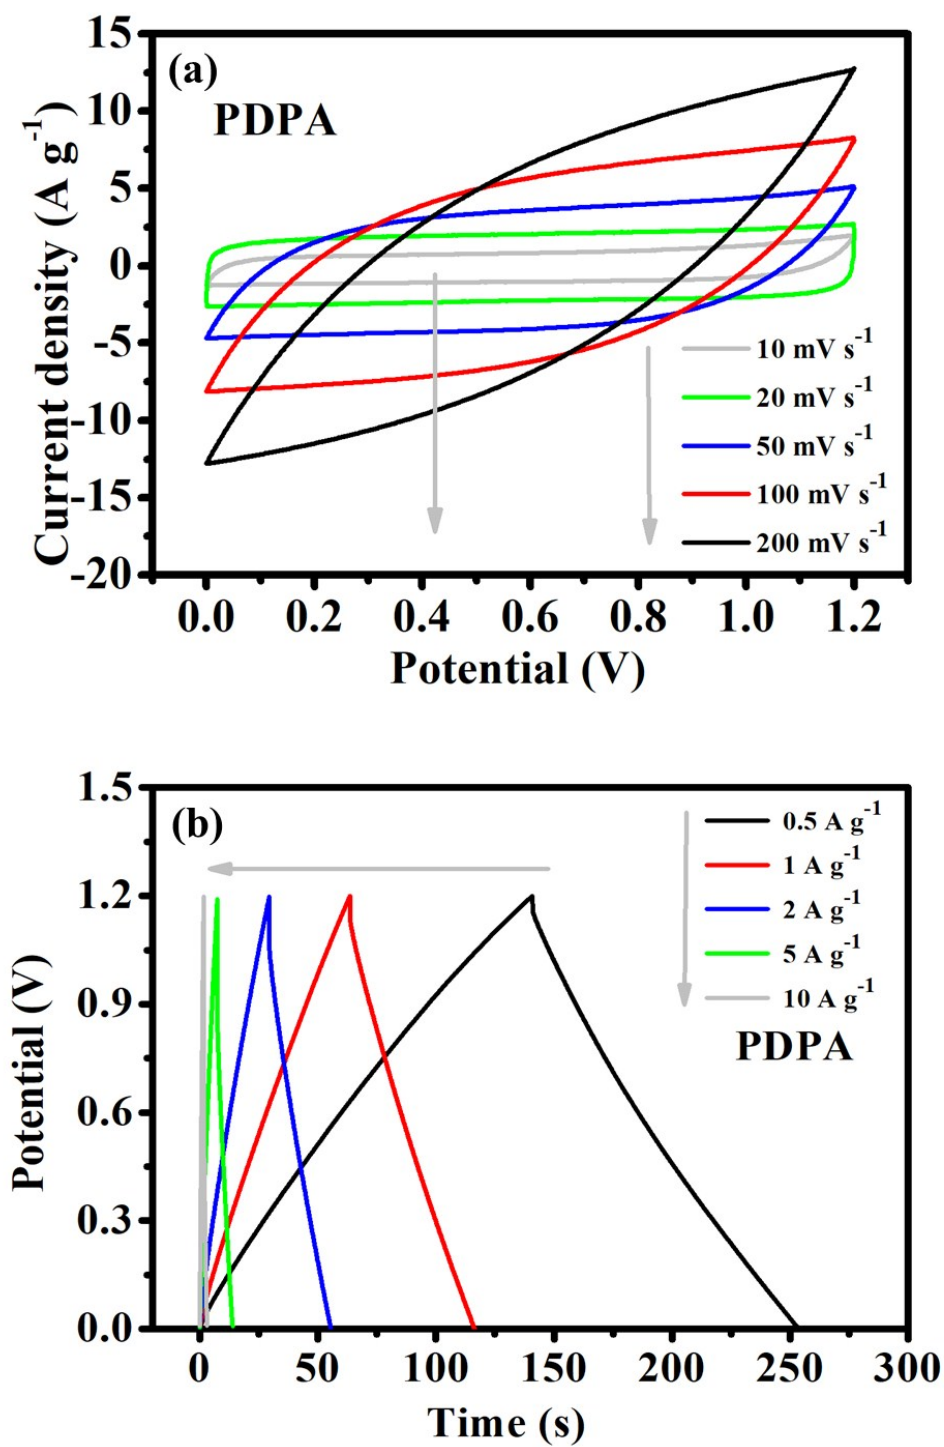

**Figure S1.** (a) CV curves of PDPA supercapacitor at different scan rates from 10 to  $200 \text{ mV s}^{-1}$ , (b) GCD curves at different current densities from  $0.5$  to  $10 \text{ A g}^{-1}$  in the voltage range of 0-1.2 V.

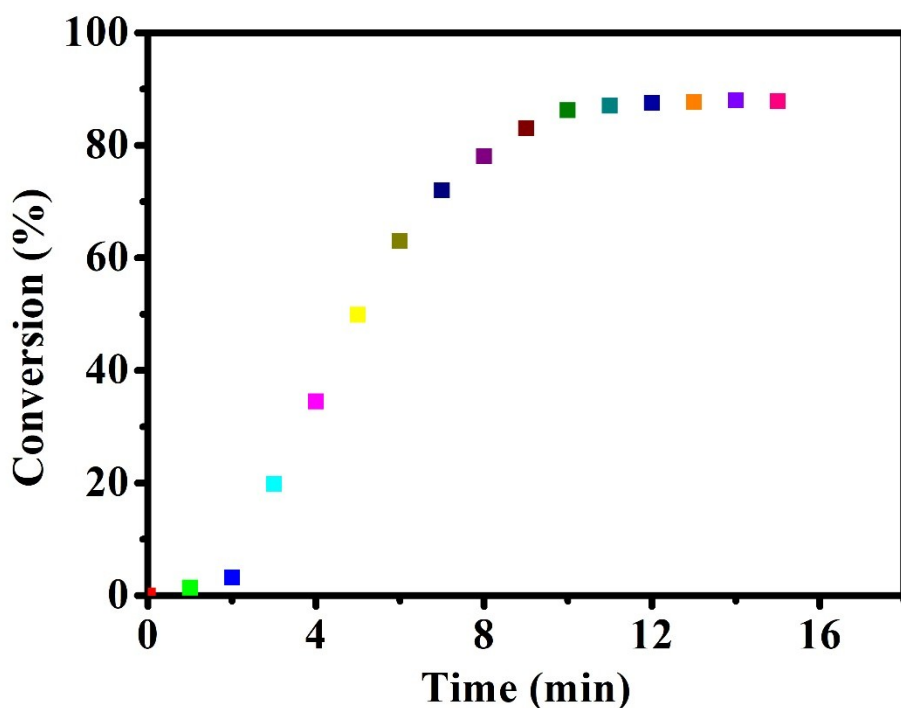

**Figure S2.** Curve of UV curing conversion rate at different irradiation time.

The UV curing conversion rate of the monomers ( $C_3(\text{Br})\text{DMAEMA}$  : PEGMA= 8:2) was estimated from the concentration of carbon-carbon double bonds.<sup>9</sup> By considering the absorption region of infrared spectroscopy, measured by Fourier transform infrared spectrometer, where the absorption peak for C=C and C=O are in the  $1637\text{ cm}^{-1}$  and  $1720\text{ cm}^{-1}$  regions, respectively. The conversion rate (C) can be calculated as follows:

$$C(\%) = \frac{(A_0^{1637}/A_0^{1720}) - (A_t^{1637}/A_t^{1720})}{A_0^{1637}/A_0^{1720}}$$

## References

1. J. Wang, M. D. Deng, Y. H. Xiao, W. T. Hao and C. F. Zhu, *New Journal Of Chemistry*, 2019, **43**, 4815-4822.
2. Y. N. Sudhakar, M. Selvakumar and D. K. Bhat, *Materials for Renewable And Sustainable Energy*, 2015, **4**.
3. C. Zhao, C. Wang, Z. Yue, K. Shu and G. G. Wallace, *ACS applied materials & interfaces*,

2013, **5**, 9008-9014.

4. Y. A. Wei, M. Wang, N. N. Xu, L. W. Peng, J. F. Mao, Q. J. Gong and J. L. Qiao, *ACS applied materials & interfaces*, 2018, **10**, 29593-29598.
5. H. Peng, Y. Y. Lv, G. G. Wei, J. Z. Zhou, X. J. Gao, K. J. Sun, G. F. Ma and Z. Q. Lei, *Journal Of Power Sources*, 2019, **431**, 210-219.
6. A. Willfahrt, E. Steiner, J. Hotzel and X. Crispin, *Appl. Phys. A-Mater. Sci. Process.*, 2019, **125**, 10.
7. H. Z. Yang, Y. Liu, L. B. Kong, L. Kang and F. Ran, *Journal Of Power Sources*, 2019, **426**, 47-54.
8. D. Kasprzak, I. Stepniak and M. Galinski, *J. Solid State Electrochem.*, 2018, **22**, 3035-3047.
9. X. Y. Li, K. H. Hu and Z. G. Lu, *J. Eur. Ceram. Soc.*, 2019, **39**, 2503-2509.
